# Supplementary figures and images for: Template-directed crystallization of carbamazepine form II from palmitic acid melt – a key to understand mechanically-induced polymorphism of carbamazepine
Source: Royal Society of Chemistry journal article supplement (doi:10.1039/d4ce00906a), 2024-01-01

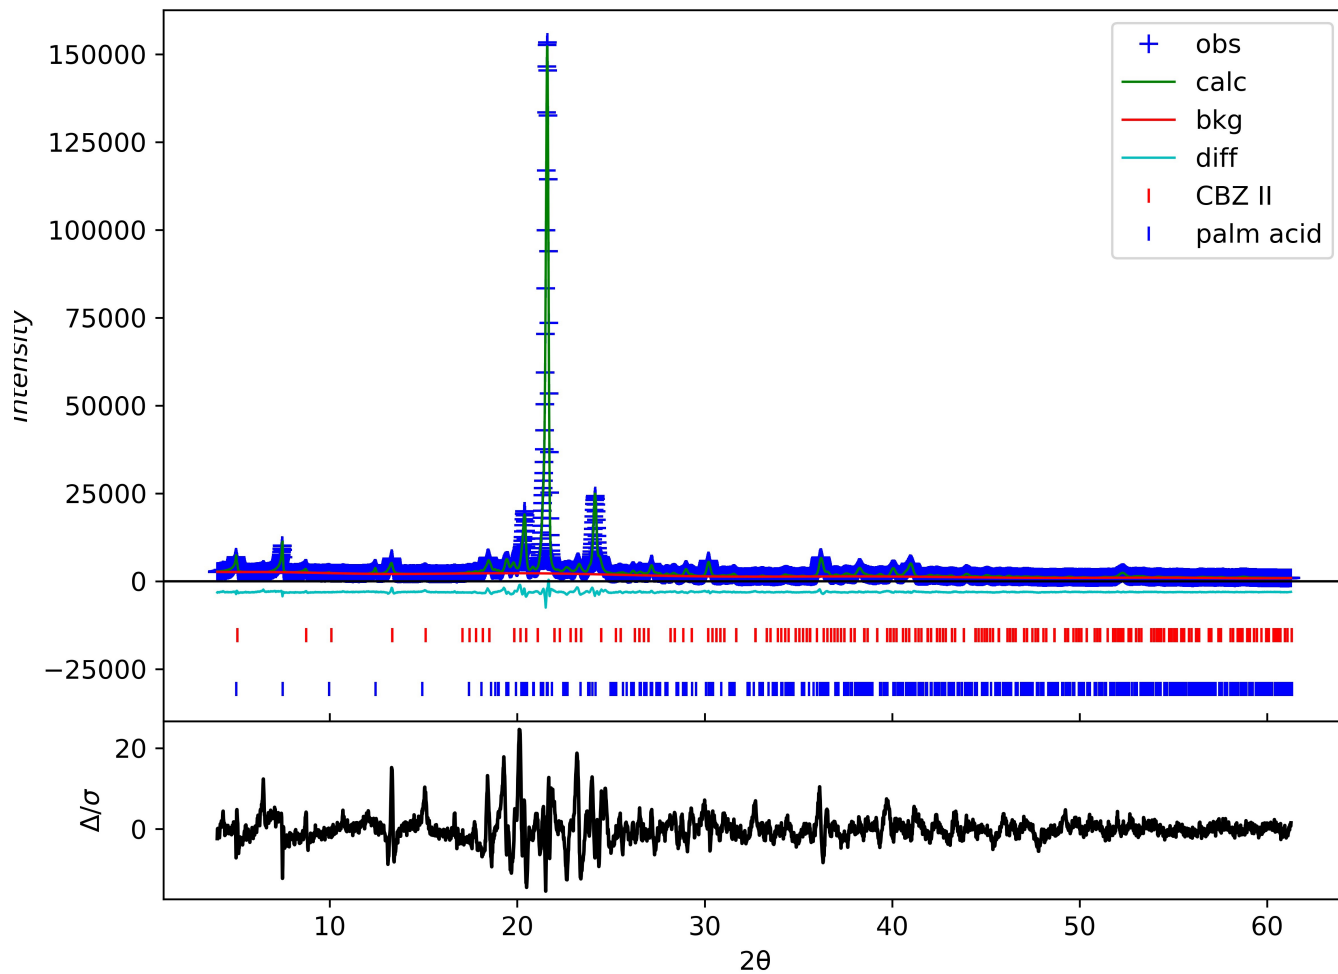

Supplement: d4ce00906a4.pdf [file d4ce00906a4.pdf]

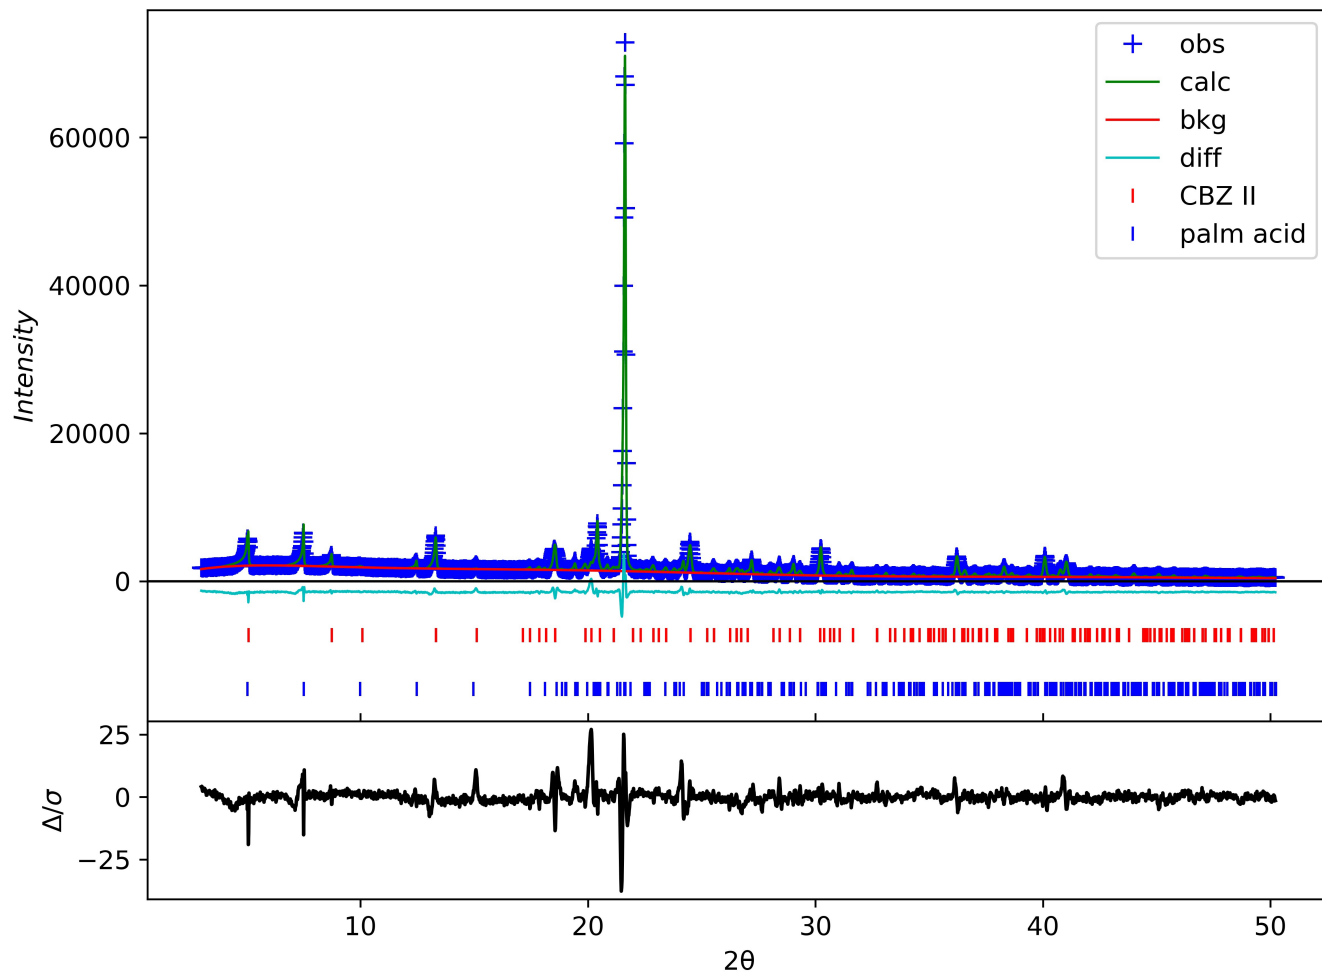

Supplement: d4ce00906a5.pdf [file d4ce00906a5.pdf]
